# Supplementary material for: A total scattering study of prenucleation structures in saturated aqueous magnesium sulfate – observation of extended clusters
Source: Royal Society of Chemistry journal article supplement (doi:10.1039/d3cp01157g), 2023-01-01
Supplement: d3cp01157g1.pdf [file d3cp01157g1.pdf]

## A total scattering study of prenucleation structures in saturated aqueous magnesium sulfate – observation of extended clusters

Daniel J. M. Irving, Mark E. Light, Matilda P. Rhodes, Terence Threlfall and Thomas F. Headen

### Supplementary Information

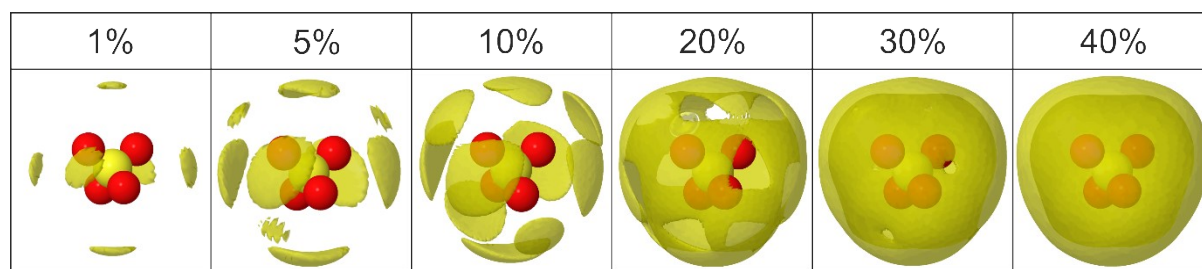

**Figure S1.** SDF for  $\text{H}_2\text{O}@\text{SO}_4$  demonstrating the dominant octahedral modes occurring prior to the tetrahedral modes.

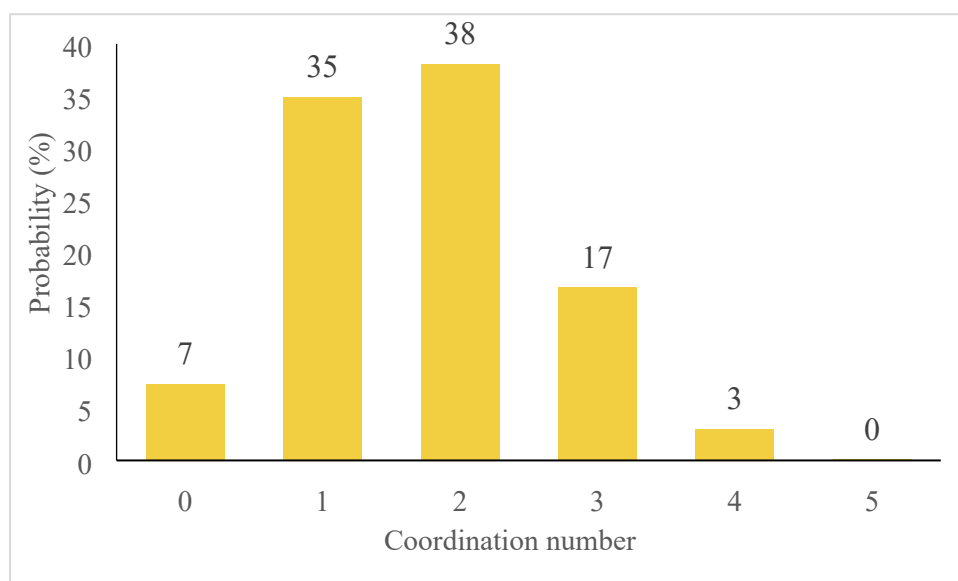

**Figure S2.** Sulfur to magnesium coordination numbers (<6 Å)

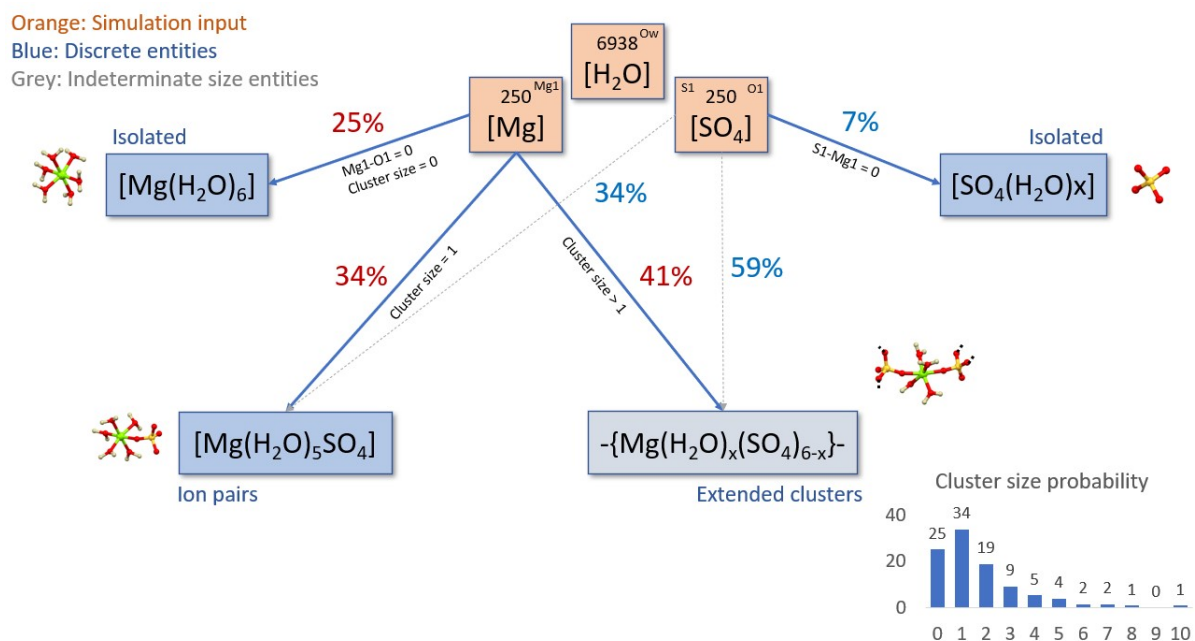

**Figure S3.** Cluster size interpretation based on cluster size analysis and coordination numbers.

**Table S1.** Minimum distance restraints applied to the EPSR refinement to supplement the seed potentials.

| Restraint | Min r / Å |
|-----------|-----------|
| Mg1 – Ow  | 1.8       |
| Hw – Hw   | 1.5       |
| Hw – Mg1  | 1.5       |
| Hw – S1   | 1.5       |
| Hw – O1s  | 1.5       |
| Mg1 – Mg1 | 3.0       |
| Mg1 – S1  | 2.0       |
| Mg1 – O1s | 1.8       |
| S1 – S1   | 3.0       |
